# Supplementary material
Source: publisher figshare collection journal article supplement (https://gsajournals.figshare.com/ndownloader/files/25833965)
Supplement: Supplementary file 1 [file 25833965]

**Figure S7.** Newly closed gap sequences are enriched for repeats and under-enriched for coding regions. 10,000 10 Mb windows were randomly drawn across the genome to generate a null background distribution. The observed density of coding sequence (A) or repeats (B) within gap sequence is indicated by a blue line.
